# Supplementary material
Source: publisher figshare collection journal article supplement (https://acs.figshare.com/ndownloader/files/4157230)
Supplement: Supplementary file 1 [file 4157230]

data_2012

_audit_creation_method            'SHELXL-97 & ZCIF'
_chemical_name_systematic
;
S9-cluster
;
_chemical_name_common             S9-cluster
_chemical_formula_moiety '3(C18 H36 K N2 O6), Sn9, 1.5(C2 H8 N2)'
_chemical_formula_sum             'C57 H120 K3 N9 O18 Sn9'
_chemical_formula_weight          2405.13

loop_
 _atom_type_symbol
 _atom_type_description
 _atom_type_scat_dispersion_real
 _atom_type_scat_dispersion_imag
 _atom_type_scat_source
 'C'  'C'   0.0033   0.0016
 'International Tables Vol C Tables 4.2.6.8 and 6.1.1.4'
 'H'  'H'   0.0000   0.0000
 'International Tables Vol C Tables 4.2.6.8 and 6.1.1.4'
 'N'  'N'   0.0061   0.0033
 'International Tables Vol C Tables 4.2.6.8 and 6.1.1.4'
 'O'  'O'   0.0106   0.0060
 'International Tables Vol C Tables 4.2.6.8 and 6.1.1.4'
 'K'  'K'   0.2009   0.2494
 'International Tables Vol C Tables 4.2.6.8 and 6.1.1.4'
 'Sn'  'Sn'  -0.6537   1.4246
 'International Tables Vol C Tables 4.2.6.8 and 6.1.1.4'

_symmetry_cell_setting            Triclinic
_symmetry_space_group_name_H-M    P-1

loop_
 _symmetry_equiv_pos_as_xyz
 'x, y, z'
 '-x, -y, -z'

_cell_length_a                    13.9891(15)
_cell_length_b                    14.8896(16)
_cell_length_c                    22.004(2)
_cell_angle_alpha                 89.391(2)
_cell_angle_beta                  79.589(2)
_cell_angle_gamma                 78.861(2)
_cell_volume                      4421.5(8)
_cell_formula_units_Z             2
_cell_measurement_temperature     100(2)
_cell_measurement_reflns_used     35037
_cell_measurement_theta_min       2.2
_cell_measurement_theta_max       32.2

_exptl_crystal_description        plate
_exptl_crystal_colour             black
_exptl_crystal_size_max           0.49
_exptl_crystal_size_mid           0.38
_exptl_crystal_size_min           0.26
_exptl_crystal_density_meas       ?
_exptl_crystal_density_diffrn     1.807
_exptl_crystal_density_method     'not measured'
_exptl_crystal_F_000              2352
_exptl_absorpt_coefficient_mu     2.697
_exptl_absorpt_correction_type    multi-scan
_exptl_absorpt_correction_T_min   0.301
_exptl_absorpt_correction_T_max   0.496
_exptl_absorpt_process_details    'SADABS (Sheldrick, 1996)'

_diffrn_ambient_temperature       100(2)
_diffrn_radiation_wavelength      0.71073
_diffrn_radiation_type            MoK\a
_diffrn_radiation_source          'fine-focus sealed tube'
_diffrn_radiation_monochromator   graphite
_diffrn_measurement_device_type   'three-circle diffractometer'
_diffrn_measurement_method        '\w and \f scans'
_diffrn_detector_area_resol_mean  11.198
_diffrn_reflns_number             59313
_diffrn_reflns_av_R_equivalents   0.0201
_diffrn_reflns_av_sigmaI/netI     0.0265
_diffrn_reflns_limit_h_min        -19
_diffrn_reflns_limit_h_max        19
_diffrn_reflns_limit_k_min        -20
_diffrn_reflns_limit_k_max        20
_diffrn_reflns_limit_l_min        -30
_diffrn_reflns_limit_l_max        30
_diffrn_reflns_theta_min          2.18
_diffrn_reflns_theta_max          30.00
_reflns_number_total              25571
_reflns_number_gt                 21241
_reflns_threshold_expression      >2sigma(I)

_computing_data_collection        'Apex2 (Bruker, 2005)'
_computing_cell_refinement        Apex2
_computing_data_reduction         Apex2
_computing_structure_solution     'SHELXS-97 (Sheldrick, 2008)'
_computing_structure_refinement   'SHELXL-97 (Sheldrick, 2008)'
_computing_molecular_graphics     'XSHEL (Bruker, 2004)'
_computing_publication_material   SHELXL-97

_refine_special_details
;
 Refinement of F^2^ against ALL reflections.  The weighted R-factor wR and
 goodness of fit S are based on F^2^, conventional R-factors R are based
 on F, with F set to zero for negative F^2^. The threshold expression of
 F^2^ > 2sigma(F^2^) is used only for calculating R-factors(gt) etc. and is
 not relevant to the choice of reflections for refinement.  R-factors based
 on F^2^ are statistically about twice as large as those based on F, and R-
 factors based on ALL data will be even larger.
;

_refine_ls_structure_factor_coef  Fsqd
_refine_ls_matrix_type            full
_refine_ls_weighting_scheme       calc
_refine_ls_weighting_details
'w=1/[\s^2^(Fo^2^)+(0.01P)^2^+20.5P], P=(max(Fo^2^,0)+2Fc^2^)/3'
_atom_sites_solution_primary      direct
_atom_sites_solution_secondary    difmap
_atom_sites_solution_hydrogens    geom
_refine_ls_hydrogen_treatment     constr
_refine_ls_extinction_method      none
_refine_ls_extinction_coef        ?
_refine_ls_number_reflns          25571
_refine_ls_number_parameters      897
_refine_ls_number_restraints      101
_refine_ls_R_factor_all           0.0450
_refine_ls_R_factor_gt            0.0345
_refine_ls_wR_factor_ref          0.0728
_refine_ls_wR_factor_gt           0.0699
_refine_ls_goodness_of_fit_ref    1.000
_refine_ls_restrained_S_all       1.003
_refine_ls_shift/su_max           0.002
_refine_ls_shift/su_mean          0.000

loop_
 _atom_site_label
 _atom_site_type_symbol
 _atom_site_fract_x
 _atom_site_fract_y
 _atom_site_fract_z
 _atom_site_U_iso_or_equiv
 _atom_site_adp_type
 _atom_site_occupancy
 _atom_site_symmetry_multiplicity
 _atom_site_calc_flag
 _atom_site_refinement_flags
 _atom_site_disorder_assembly
 _atom_site_disorder_group
Sn1 Sn 0.702701(16) 0.140182(15) 0.741365(11) 0.02300(5) Uani 1 1 d . . .
Sn2 Sn 0.914398(17) 0.157947(16) 0.754114(12) 0.02466(5) Uani 1 1 d . . .
Sn3 Sn 0.736219(18) 0.252163(18) 0.849300(12) 0.02772(5) Uani 1 1 d . . .
Sn4 Sn 0.571378(17) 0.316988(17) 0.782886(12) 0.02803(5) Uani 1 1 d . . .
Sn5 Sn 0.853211(18) 0.165893(16) 0.632449(12) 0.02633(5) Uani 1 1 d . . .
Sn6 Sn 0.903933(19) 0.342078(17) 0.803800(13) 0.02898(6) Uani 1 1 d . . .
Sn7 Sn 0.686849(16) 0.324874(16) 0.657645(11) 0.02271(5) Uani 1 1 d . . .
Sn8 Sn 0.897590(17) 0.342215(16) 0.668841(12) 0.02539(5) Uani 1 1 d . . .
Sn9 Sn 0.720279(18) 0.436921(16) 0.764623(12) 0.02698(5) Uani 1 1 d . . .
K1 K 0.33512(5) 0.20938(5) 0.51381(3) 0.01992(12) Uani 1 1 d . . .
N1A N 0.4017(2) 0.1689(2) 0.37544(13) 0.0247(6) Uani 1 1 d . . .
C11A C 0.5094(3) 0.1621(3) 0.35893(17) 0.0320(8) Uani 1 1 d . . .
H11A H 0.5240 0.2247 0.3574 0.038 Uiso 1 1 calc R . .
H11B H 0.5326 0.1340 0.3170 0.038 Uiso 1 1 calc R . .
C12A C 0.5670(3) 0.1071(3) 0.40283(18) 0.0330(8) Uani 1 1 d . . .
H12A H 0.5534 0.0442 0.4050 0.040 Uiso 1 1 calc R . .
H12B H 0.6390 0.1030 0.3880 0.040 Uiso 1 1 calc R . .
O13A O 0.53851(17) 0.15050(17) 0.46233(12) 0.0266(5) Uani 1 1 d . . .
C14A C 0.5975(3) 0.1043(3) 0.50394(19) 0.0314(8) Uani 1 1 d . . .
H14A H 0.6686 0.0999 0.4862 0.038 Uiso 1 1 calc R . .
H14B H 0.5847 0.0415 0.5101 0.038 Uiso 1 1 calc R . .
C15A C 0.5735(3) 0.1547(3) 0.56381(19) 0.0327(8) Uani 1 1 d . . .
H15A H 0.6206 0.1273 0.5906 0.039 Uiso 1 1 calc R . .
H15B H 0.5798 0.2193 0.5572 0.039 Uiso 1 1 calc R . .
O16A O 0.47528(19) 0.1507(2) 0.59295(12) 0.0335(6) Uani 1 1 d . . .
C17A C 0.4551(3) 0.1991(4) 0.6514(2) 0.0456(11) Uani 1 1 d . . .
H17A H 0.4630 0.2633 0.6449 0.055 Uiso 1 1 calc R . .
H17B H 0.5024 0.1701 0.6776 0.055 Uiso 1 1 calc R . .
C18A C 0.3516(3) 0.1967(4) 0.68263(19) 0.0489(12) Uani 1 1 d . . .
H18A H 0.3440 0.1320 0.6865 0.059 Uiso 1 1 calc R . .
H18B H 0.3409 0.2233 0.7249 0.059 Uiso 1 1 calc R . .
C21A C 0.3753(3) 0.0815(3) 0.36143(17) 0.0294(7) Uani 1 1 d . . .
H21A H 0.4222 0.0309 0.3760 0.035 Uiso 1 1 calc R . .
H21B H 0.3832 0.0740 0.3160 0.035 Uiso 1 1 calc R . .
C22A C 0.2706(3) 0.0738(2) 0.39063(17) 0.0281(7) Uani 1 1 d . . .
H22A H 0.2230 0.1259 0.3783 0.034 Uiso 1 1 calc R . .
H22B H 0.2554 0.0164 0.3761 0.034 Uiso 1 1 calc R . .
O23A O 0.26119(17) 0.07400(16) 0.45623(11) 0.0237(5) Uani 1 1 d . . .
C24A C 0.1617(2) 0.0718(2) 0.48503(18) 0.0274(7) Uani 1 1 d . . .
H24A H 0.1390 0.0213 0.4664 0.033 Uiso 1 1 calc R . .
H24B H 0.1178 0.1300 0.4780 0.033 Uiso 1 1 calc R . .
C25A C 0.1556(3) 0.0581(2) 0.55268(18) 0.0287(7) Uani 1 1 d . . .
H25A H 0.0866 0.0557 0.5722 0.034 Uiso 1 1 calc R . .
H25B H 0.1986 -0.0006 0.5599 0.034 Uiso 1 1 calc R . .
O26A O 0.18645(18) 0.13164(18) 0.57912(12) 0.0279(5) Uani 1 1 d . . .
C27A C 0.1787(3) 0.1231(3) 0.64423(18) 0.0336(8) Uani 1 1 d . . .
H27A H 0.2343 0.0762 0.6536 0.040 Uiso 1 1 calc R . .
H27B H 0.1158 0.1039 0.6621 0.040 Uiso 1 1 calc R . .
C28A C 0.1816(3) 0.2140(3) 0.67168(18) 0.0370(9) Uani 1 1 d . . .
H28A H 0.1260 0.2600 0.6614 0.044 Uiso 1 1 calc R . .
H28B H 0.1712 0.2095 0.7172 0.044 Uiso 1 1 calc R . .
C31A C 0.3520(3) 0.2440(3) 0.34134(17) 0.0315(8) Uani 1 1 d . . .
H31A H 0.2845 0.2341 0.3396 0.038 Uiso 1 1 calc R . .
H31B H 0.3889 0.2420 0.2984 0.038 Uiso 1 1 calc R . .
C32A C 0.3441(3) 0.3372(3) 0.36947(19) 0.0330(8) Uani 1 1 d . . .
H32A H 0.4104 0.3463 0.3748 0.040 Uiso 1 1 calc R . .
H32B H 0.3176 0.3850 0.3420 0.040 Uiso 1 1 calc R . .
O33A O 0.2791(2) 0.34407(17) 0.42828(13) 0.0316(6) Uani 1 1 d . . .
C34A C 0.2571(4) 0.4361(3) 0.4527(2) 0.0445(11) Uani 1 1 d . . .
H34A H 0.2214 0.4774 0.4250 0.053 Uiso 1 1 calc R . .
H34B H 0.3195 0.4569 0.4551 0.053 Uiso 1 1 calc R . .
C35A C 0.1949(3) 0.4397(3) 0.5152(2) 0.0461(11) Uani 1 1 d . . .
H35A H 0.1723 0.5042 0.5301 0.055 Uiso 1 1 calc R . .
H35B H 0.1357 0.4133 0.5134 0.055 Uiso 1 1 calc R . .
O36A O 0.2511(2) 0.38928(19) 0.55688(14) 0.0375(7) Uani 1 1 d . . .
C37A C 0.1998(3) 0.4026(3) 0.6197(2) 0.0484(12) Uani 1 1 d . . .
H37A H 0.1344 0.3849 0.6235 0.058 Uiso 1 1 calc R . .
H37B H 0.1887 0.4681 0.6319 0.058 Uiso 1 1 calc R . .
C38A C 0.2589(3) 0.3464(4) 0.6615(2) 0.0484(13) Uani 1 1 d . . .
H38A H 0.3243 0.3644 0.6567 0.058 Uiso 1 1 calc R . .
H38B H 0.2248 0.3607 0.7047 0.058 Uiso 1 1 calc R . .
N2A N 0.2748(2) 0.2464(3) 0.65032(15) 0.0350(8) Uani 1 1 d . . .
K2 K 0.80093(5) 0.32311(5) 0.30493(3) 0.02113(13) Uani 1 1 d . . .
N1B N 0.9491(2) 0.24484(19) 0.38756(14) 0.0247(6) Uani 1 1 d . . .
C11B C 0.9116(3) 0.2837(3) 0.45063(18) 0.0320(8) Uani 1 1 d . . .
H11C H 0.9269 0.3457 0.4523 0.038 Uiso 1 1 calc R . .
H11D H 0.9474 0.2454 0.4796 0.038 Uiso 1 1 calc R . .
C12B C 0.8019(3) 0.2902(3) 0.47235(19) 0.0358(9) Uani 1 1 d . . .
H12C H 0.7849 0.2290 0.4697 0.043 Uiso 1 1 calc R . .
H12D H 0.7832 0.3120 0.5160 0.043 Uiso 1 1 calc R . .
O13B O 0.74827(18) 0.35239(18) 0.43470(12) 0.0283(5) Uani 1 1 d . . .
C14B C 0.6445(3) 0.3669(3) 0.45834(18) 0.0320(8) Uani 1 1 d . . .
H14C H 0.6311 0.3873 0.5022 0.038 Uiso 1 1 calc R . .
H14D H 0.6204 0.3090 0.4558 0.038 Uiso 1 1 calc R . .
C15B C 0.5919(3) 0.4380(3) 0.42128(18) 0.0314(8) Uani 1 1 d . . .
H15C H 0.5209 0.4543 0.4403 0.038 Uiso 1 1 calc R . .
H15D H 0.6206 0.4939 0.4204 0.038 Uiso 1 1 calc R . .
O16B O 0.60223(18) 0.40280(17) 0.36022(12) 0.0278(5) Uani 1 1 d . . .
C17B C 0.5509(3) 0.4672(2) 0.32274(19) 0.0294(8) Uani 1 1 d . . .
H17C H 0.5823 0.5216 0.3168 0.035 Uiso 1 1 calc R . .
H17D H 0.4811 0.4876 0.3434 0.035 Uiso 1 1 calc R . .
C18B C 0.5546(2) 0.4227(2) 0.26142(18) 0.0281(7) Uani 1 1 d . . .
H18C H 0.5283 0.3656 0.2685 0.034 Uiso 1 1 calc R . .
H18D H 0.5107 0.4641 0.2381 0.034 Uiso 1 1 calc R . .
C21B C 0.9558(3) 0.1447(2) 0.38722(18) 0.0292(7) Uani 1 1 d . . .
H21C H 0.8967 0.1304 0.4148 0.035 Uiso 1 1 calc R . .
H21D H 1.0148 0.1157 0.4043 0.035 Uiso 1 1 calc R . .
C22B C 0.9628(3) 0.1035(2) 0.32439(19) 0.0311(8) Uani 1 1 d . . .
H22C H 1.0155 0.1247 0.2948 0.037 Uiso 1 1 calc R . .
H22D H 0.9800 0.0359 0.3259 0.037 Uiso 1 1 calc R . .
O23B O 0.86989(18) 0.13030(16) 0.30456(12) 0.0274(5) Uani 1 1 d . . .
C24B C 0.8722(3) 0.0891(3) 0.2464(2) 0.0364(9) Uani 1 1 d . . .
H24C H 0.8910 0.0218 0.2486 0.044 Uiso 1 1 calc R . .
H24D H 0.9222 0.1104 0.2147 0.044 Uiso 1 1 calc R . .
C25B C 0.7723(3) 0.1143(2) 0.2287(2) 0.0345(9) Uani 1 1 d . . .
H25C H 0.7712 0.0799 0.1907 0.041 Uiso 1 1 calc R . .
H25D H 0.7213 0.0983 0.2622 0.041 Uiso 1 1 calc R . .
O26B O 0.75168(19) 0.21015(17) 0.21850(13) 0.0296(5) Uani 1 1 d . . .
C27B C 0.6622(3) 0.2371(3) 0.19553(18) 0.0298(7) Uani 1 1 d . . .
H27C H 0.6048 0.2329 0.2285 0.036 Uiso 1 1 calc R . .
H27D H 0.6613 0.1959 0.1607 0.036 Uiso 1 1 calc R . .
C28B C 0.6552(3) 0.3344(3) 0.17404(18) 0.0314(8) Uani 1 1 d . . .
H28C H 0.7120 0.3370 0.1404 0.038 Uiso 1 1 calc R . .
H28D H 0.5938 0.3527 0.1568 0.038 Uiso 1 1 calc R . .
C31B C 1.0463(3) 0.2678(3) 0.3643(2) 0.0311(8) Uani 1 1 d . . .
H31C H 1.0836 0.2217 0.3322 0.037 Uiso 1 1 calc R . .
H31D H 1.0839 0.2642 0.3986 0.037 Uiso 1 1 calc R . .
C32B C 1.0401(3) 0.3618(3) 0.3372(2) 0.0336(8) Uani 1 1 d . . .
H32C H 1.0005 0.4086 0.3682 0.040 Uiso 1 1 calc R . .
H32D H 1.1073 0.3757 0.3253 0.040 Uiso 1 1 calc R . .
O33B O 0.99441(19) 0.36318(17) 0.28435(13) 0.0303(6) Uani 1 1 d . . .
C34B C 1.0030(3) 0.4443(2) 0.25000(19) 0.0309(8) Uani 1 1 d . . .
H34C H 1.0738 0.4458 0.2351 0.037 Uiso 1 1 calc R . .
H34D H 0.9733 0.4990 0.2770 0.037 Uiso 1 1 calc R . .
C35B C 0.9512(3) 0.4456(3) 0.19634(18) 0.0318(8) Uani 1 1 d . . .
H35C H 0.9645 0.4971 0.1694 0.038 Uiso 1 1 calc R . .
H35D H 0.9759 0.3879 0.1717 0.038 Uiso 1 1 calc R . .
O36B O 0.84699(18) 0.45594(18) 0.21873(12) 0.0298(5) Uani 1 1 d . . .
C37B C 0.7923(3) 0.4735(3) 0.16961(19) 0.0347(8) Uani 1 1 d . . .
H37C H 0.8128 0.4220 0.1390 0.042 Uiso 1 1 calc R . .
H37D H 0.8059 0.5299 0.1484 0.042 Uiso 1 1 calc R . .
C38B C 0.6829(3) 0.4847(3) 0.1958(2) 0.0335(8) Uani 1 1 d . . .
H38C H 0.6643 0.5343 0.2279 0.040 Uiso 1 1 calc R . .
H38D H 0.6449 0.5036 0.1624 0.040 Uiso 1 1 calc R . .
N2B N 0.6547(2) 0.4004(2) 0.22330(14) 0.0263(6) Uani 1 1 d . . .
K3 K 0.26950(6) 0.18057(6) 0.01401(4) 0.02853(15) Uani 1 1 d . . .
N1C N 0.3200(3) 0.2130(3) 0.13921(18) 0.0495(10) Uani 1 1 d . . .
C11C C 0.4258(4) 0.2170(4) 0.1308(3) 0.0547(13) Uani 1 1 d . . .
H11E H 0.4468 0.2092 0.1714 0.066 Uiso 1 1 calc R . .
H11F H 0.4343 0.2786 0.1163 0.066 Uiso 1 1 calc R . .
C12C C 0.4929(4) 0.1472(4) 0.0863(2) 0.0556(13) Uani 1 1 d . . .
H12E H 0.5627 0.1527 0.0849 0.067 Uiso 1 1 calc R . .
H12F H 0.4855 0.0849 0.0998 0.067 Uiso 1 1 calc R . .
O13C O 0.4676(2) 0.1620(2) 0.02657(14) 0.0423(7) Uani 1 1 d . . .
C14C C 0.5417(3) 0.1169(4) -0.0219(2) 0.0471(11) Uani 1 1 d . . .
H14E H 0.5518 0.0499 -0.0160 0.057 Uiso 1 1 calc R . .
H14F H 0.6051 0.1365 -0.0207 0.057 Uiso 1 1 calc R . .
C15C C 0.5133(3) 0.1378(4) -0.0812(2) 0.0481(11) Uani 1 1 d . . .
H15E H 0.5033 0.2048 -0.0870 0.058 Uiso 1 1 calc R . .
H15F H 0.5672 0.1080 -0.1145 0.058 Uiso 1 1 calc R . .
O16C O 0.4231(2) 0.1065(2) -0.08567(13) 0.0353(6) Uani 1 1 d . . .
C17C C 0.3995(3) 0.1217(4) -0.1452(2) 0.0448(11) Uani 1 1 d . . .
H17E H 0.4540 0.0881 -0.1767 0.054 Uiso 1 1 calc R . .
H17F H 0.3913 0.1878 -0.1542 0.054 Uiso 1 1 calc R . .
C18C C 0.3052(3) 0.0892(3) -0.14820(19) 0.0405(10) Uani 1 1 d . . .
H18E H 0.2947 0.0921 -0.1915 0.049 Uiso 1 1 calc R . .
H18F H 0.3133 0.0242 -0.1363 0.049 Uiso 1 1 calc R . .
C21C C 0.2575(5) 0.2977(4) 0.1662(2) 0.0586(14) Uani 1 1 d . . .
H21E H 0.2852 0.3178 0.2009 0.070 Uiso 1 1 calc R . .
H21F H 0.1905 0.2863 0.1831 0.070 Uiso 1 1 calc R . .
C22C C 0.2490(5) 0.3747(4) 0.1192(2) 0.0554(13) Uani 1 1 d . . .
H22E H 0.2148 0.4333 0.1407 0.066 Uiso 1 1 calc R . .
H22F H 0.3159 0.3820 0.0984 0.066 Uiso 1 1 calc R . .
O23C O 0.1942(3) 0.3524(2) 0.07420(14) 0.0446(7) Uani 1 1 d . . .
C24C C 0.1748(4) 0.4253(3) 0.0349(2) 0.0434(10) Uani 1 1 d . . .
H24E H 0.2380 0.4391 0.0124 0.052 Uiso 1 1 calc R . .
H24F H 0.1381 0.4806 0.0596 0.052 Uiso 1 1 calc R . .
C25C C 0.1145(3) 0.4018(3) -0.0104(2) 0.0393(9) Uani 1 1 d . . .
H25E H 0.0526 0.3852 0.0119 0.047 Uiso 1 1 calc R . .
H25F H 0.0967 0.4553 -0.0361 0.047 Uiso 1 1 calc R . .
O26C O 0.1712(2) 0.32698(19) -0.04858(13) 0.0357(6) Uani 1 1 d . . .
C27C C 0.1180(3) 0.3003(3) -0.0928(2) 0.0347(8) Uani 1 1 d . . .
H27E H 0.0918 0.3545 -0.1156 0.042 Uiso 1 1 calc R . .
H27F H 0.0612 0.2746 -0.0713 0.042 Uiso 1 1 calc R . .
C28C C 0.1844(4) 0.2307(3) -0.13701(19) 0.0393(9) Uani 1 1 d . . .
H28E H 0.2441 0.2549 -0.1552 0.047 Uiso 1 1 calc R . .
H28F H 0.1498 0.2205 -0.1711 0.047 Uiso 1 1 calc R . .
C31C C 0.2970(5) 0.1366(4) 0.1793(2) 0.0601(15) Uani 1 1 d . . .
H31E H 0.2942 0.1552 0.2228 0.072 Uiso 1 1 calc R . .
H31F H 0.3522 0.0834 0.1690 0.072 Uiso 1 1 calc R . .
C32C C 0.2030(4) 0.1066(4) 0.1749(2) 0.0604(15) Uani 1 1 d . . .
H32E H 0.1924 0.0579 0.2048 0.073 Uiso 1 1 calc R . .
H32F H 0.1467 0.1588 0.1851 0.073 Uiso 1 1 calc R . .
O33C O 0.2077(3) 0.0736(3) 0.11476(16) 0.0540(9) Uani 1 1 d . . .
C34C C 0.1286(4) 0.0293(5) 0.1109(3) 0.0689(18) Uani 1 1 d . . .
H34E H 0.0656 0.0746 0.1174 0.083 Uiso 1 1 calc R . .
H34F H 0.1239 -0.0166 0.1436 0.083 Uiso 1 1 calc R . .
C35C C 0.1443(5) -0.0167(4) 0.0493(3) 0.0699(19) Uani 1 1 d . . .
H35E H 0.2101 -0.0579 0.0408 0.084 Uiso 1 1 calc R . .
H35F H 0.0929 -0.0537 0.0483 0.084 Uiso 1 1 calc R . .
O36C O 0.1387(3) 0.0518(2) 0.00409(17) 0.0501(8) Uani 1 1 d . . .
C37C C 0.1480(4) 0.0136(3) -0.0575(3) 0.0521(12) Uani 1 1 d . . .
H37E H 0.0966 -0.0235 -0.0581 0.062 Uiso 1 1 calc R . .
H37F H 0.2138 -0.0267 -0.0697 0.062 Uiso 1 1 calc R . .
C38C C 0.1363(3) 0.0891(3) -0.1011(2) 0.0434(10) Uani 1 1 d . . .
H38E H 0.1338 0.0635 -0.1420 0.052 Uiso 1 1 calc R . .
H38F H 0.0723 0.1311 -0.0865 0.052 Uiso 1 1 calc R . .
N2C N 0.2157(3) 0.1416(2) -0.10842(15) 0.0315(7) Uani 1 1 d . . .
N1D N 0.8883(7) 0.2647(7) 0.0509(5) 0.093(3) Uani 0.675(7) 1 d PDU A 1
H1D1 H 0.9402 0.2205 0.0334 0.140 Uiso 0.675(7) 1 calc PR A 1
H1D2 H 0.8399 0.2381 0.0727 0.140 Uiso 0.675(7) 1 calc PR A 1
C1D C 0.8514(5) 0.3174(6) 0.0051(3) 0.0527(19) Uani 0.675(7) 1 d PDU A 1
H1D4 H 0.8836 0.3714 0.0001 0.063 Uiso 0.675(7) 1 calc PR A 1
H1D5 H 0.8731 0.2811 -0.0341 0.063 Uiso 0.675(7) 1 calc PR A 1
C2D C 0.7502(6) 0.3490(5) 0.0118(4) 0.062(2) Uani 0.675(7) 1 d PDU A 1
H2D1 H 0.7360 0.3783 -0.0270 0.074 Uiso 0.675(7) 1 calc PR A 1
H2D2 H 0.7302 0.3969 0.0450 0.074 Uiso 0.675(7) 1 calc PR A 1
N2D N 0.6908(6) 0.2821(6) 0.0261(4) 0.074(2) Uani 0.675(7) 1 d PDU A 1
H2D3 H 0.7127 0.2344 -0.0017 0.110 Uiso 0.675(7) 1 calc PR A 1
H2D4 H 0.6267 0.3072 0.0243 0.110 Uiso 0.675(7) 1 calc PR A 1
N1E N 0.4900(10) 0.4704(9) 0.0795(4) 0.144(5) Uani 0.716(13) 1 d PDU B 1
H1E1 H 0.4240 0.4826 0.0955 0.215 Uiso 0.716(13) 1 calc PR B 1
H1E2 H 0.5242 0.4859 0.1080 0.215 Uiso 0.716(13) 1 calc PR B 1
C1E C 0.5081(12) 0.5207(8) 0.0270(3) 0.129(6) Uani 0.716(13) 1 d PDU . 1
H1E4 H 0.5776 0.5293 0.0205 0.155 Uiso 0.716(13) 1 calc PR B 1
H1E5 H 0.4646 0.5820 0.0336 0.155 Uiso 0.716(13) 1 calc PR B 1
N1F N 1.0036(13) 0.2323(15) 0.0597(10) 0.104(7) Uiso 0.325(7) 1 d PDU A 3
C1F C 0.9064(12) 0.2164(14) 0.0787(7) 0.070(5) Uiso 0.325(7) 1 d PDU A 3
C2F C 0.8458(15) 0.2435(18) 0.0333(11) 0.092(8) Uiso 0.325(7) 1 d PDU A 3
N2F N 0.769(2) 0.196(2) 0.0345(15) 0.181(14) Uiso 0.325(7) 1 d PDU A 3
N1G N 0.569(2) 0.3698(17) 0.0119(12) 0.080 Uiso 0.246(12) 1 d P . 4
C2G C 0.486(2) 0.616(2) 0.0139(15) 0.080 Uiso 0.248(16) 1 d P . 4
C3G C 0.885(3) 0.174(3) 0.0114(18) 0.080 Uiso 0.189(15) 1 d P C 4

loop_
 _atom_site_aniso_label
 _atom_site_aniso_U_11
 _atom_site_aniso_U_22
 _atom_site_aniso_U_33
 _atom_site_aniso_U_23
 _atom_site_aniso_U_13
 _atom_site_aniso_U_12
Sn1 0.02052(10) 0.01824(10) 0.03059(12) -0.00227(8) -0.00216(8) -0.00679(8)
Sn2 0.01836(10) 0.01938(10) 0.03435(13) 0.00454(9) -0.00326(9) -0.00072(8)
Sn3 0.02668(11) 0.03124(12) 0.02561(12) -0.00115(9) -0.00252(9) -0.00851(9)
Sn4 0.01889(10) 0.02734(12) 0.03456(13) -0.00246(10) -0.00008(9) -0.00066(9)
Sn5 0.02555(11) 0.02169(11) 0.02831(12) -0.00370(9) 0.00063(9) -0.00111(9)
Sn6 0.02995(12) 0.02545(12) 0.03863(14) 0.00599(10) -0.01737(10) -0.01264(9)
Sn7 0.02029(10) 0.02204(10) 0.02610(11) -0.00125(8) -0.00738(8) -0.00178(8)
Sn8 0.02170(10) 0.02405(11) 0.03215(13) 0.00702(9) -0.00546(9) -0.00853(9)
Sn9 0.02893(12) 0.01781(10) 0.03548(13) -0.00430(9) -0.01147(10) -0.00214(9)
K1 0.0171(3) 0.0207(3) 0.0220(3) -0.0010(2) -0.0036(2) -0.0036(2)
N1A 0.0265(14) 0.0268(14) 0.0213(14) 0.0012(11) -0.0048(11) -0.0059(11)
C11A 0.0292(18) 0.040(2) 0.0243(18) 0.0001(15) 0.0023(14) -0.0074(15)
C12A 0.0222(16) 0.037(2) 0.035(2) -0.0044(16) -0.0001(14) 0.0011(14)
O13A 0.0196(11) 0.0281(12) 0.0298(13) 0.0006(10) -0.0060(9) 0.0020(9)
C14A 0.0185(15) 0.0315(19) 0.044(2) 0.0090(16) -0.0119(14) 0.0008(13)
C15A 0.0273(17) 0.034(2) 0.042(2) 0.0040(16) -0.0171(16) -0.0084(15)
O16A 0.0257(13) 0.0493(17) 0.0271(13) -0.0042(12) -0.0098(10) -0.0066(12)
C17A 0.035(2) 0.076(3) 0.031(2) -0.005(2) -0.0094(17) -0.021(2)
C18A 0.037(2) 0.090(4) 0.0218(19) -0.001(2) -0.0045(16) -0.019(2)
C21A 0.0343(19) 0.0282(18) 0.0251(18) -0.0049(14) -0.0039(14) -0.0055(14)
C22A 0.0324(18) 0.0253(17) 0.0288(18) -0.0034(14) -0.0099(14) -0.0067(14)
O23A 0.0197(11) 0.0248(12) 0.0270(12) 0.0000(9) -0.0055(9) -0.0043(9)
C24A 0.0199(15) 0.0251(16) 0.039(2) -0.0017(14) -0.0089(14) -0.0056(13)
C25A 0.0195(15) 0.0248(17) 0.041(2) -0.0004(15) -0.0021(14) -0.0065(13)
O26A 0.0252(12) 0.0335(13) 0.0263(13) 0.0006(10) -0.0013(10) -0.0118(10)
C27A 0.0257(17) 0.045(2) 0.0286(19) 0.0028(16) 0.0020(14) -0.0105(16)
C28A 0.0278(18) 0.054(3) 0.0256(19) -0.0069(17) 0.0060(14) -0.0102(17)
C31A 0.038(2) 0.037(2) 0.0251(18) 0.0080(15) -0.0124(15) -0.0137(16)
C32A 0.038(2) 0.0287(18) 0.037(2) 0.0133(15) -0.0134(16) -0.0112(16)
O33A 0.0337(14) 0.0194(12) 0.0416(16) 0.0063(11) -0.0073(11) -0.0049(10)
C34A 0.049(3) 0.0171(17) 0.066(3) 0.0033(18) -0.011(2) -0.0029(16)
C35A 0.039(2) 0.0233(19) 0.070(3) -0.0103(19) -0.004(2) 0.0048(16)
O36A 0.0321(14) 0.0280(14) 0.0478(17) -0.0134(12) 0.0045(12) -0.0046(11)
C37A 0.042(2) 0.037(2) 0.058(3) -0.025(2) 0.017(2) -0.0122(19)
C38A 0.041(2) 0.067(3) 0.038(2) -0.029(2) 0.0085(19) -0.025(2)
N2A 0.0245(15) 0.055(2) 0.0268(16) -0.0088(15) 0.0003(12) -0.0137(14)
K2 0.0193(3) 0.0171(3) 0.0265(3) -0.0004(2) -0.0025(2) -0.0040(2)
N1B 0.0246(14) 0.0175(13) 0.0328(16) 0.0002(11) -0.0074(12) -0.0042(11)
C11B 0.0360(19) 0.0284(18) 0.032(2) -0.0016(15) -0.0131(16) -0.0011(15)
C12B 0.039(2) 0.037(2) 0.0278(19) 0.0061(16) -0.0051(16) -0.0006(17)
O13B 0.0249(12) 0.0290(13) 0.0286(13) 0.0013(10) -0.0006(10) -0.0033(10)
C14B 0.0285(18) 0.037(2) 0.0277(19) -0.0031(15) 0.0025(14) -0.0078(15)
C15B 0.0240(16) 0.0328(19) 0.034(2) -0.0085(15) 0.0036(14) -0.0041(14)
O16B 0.0229(11) 0.0230(12) 0.0336(14) -0.0036(10) -0.0017(10) 0.0019(9)
C17B 0.0205(15) 0.0223(16) 0.043(2) 0.0010(15) -0.0037(14) -0.0010(13)
C18B 0.0178(15) 0.0265(17) 0.040(2) 0.0055(15) -0.0071(14) -0.0030(13)
C21B 0.0325(18) 0.0190(15) 0.039(2) 0.0050(14) -0.0144(15) -0.0037(13)
C22B 0.0259(17) 0.0208(16) 0.047(2) -0.0031(15) -0.0124(15) 0.0012(13)
O23B 0.0246(12) 0.0202(11) 0.0365(14) -0.0073(10) -0.0088(10) 0.0017(9)
C24B 0.036(2) 0.0256(18) 0.044(2) -0.0142(16) -0.0107(17) 0.0075(15)
C25B 0.037(2) 0.0217(17) 0.047(2) -0.0106(16) -0.0160(17) -0.0003(15)
O26B 0.0270(12) 0.0241(12) 0.0397(15) -0.0054(11) -0.0117(11) -0.0041(10)
C27B 0.0275(17) 0.0281(18) 0.036(2) -0.0038(15) -0.0106(15) -0.0052(14)
C28B 0.0299(18) 0.035(2) 0.0318(19) 0.0031(15) -0.0108(15) -0.0083(15)
C31B 0.0231(16) 0.0257(17) 0.047(2) 0.0028(15) -0.0109(15) -0.0057(13)
C32B 0.0299(18) 0.0269(18) 0.050(2) 0.0055(16) -0.0157(17) -0.0123(15)
O33B 0.0282(13) 0.0248(12) 0.0430(16) 0.0080(11) -0.0112(11) -0.0135(10)
C34B 0.0256(17) 0.0240(17) 0.045(2) 0.0087(15) -0.0035(15) -0.0115(14)
C35B 0.0283(17) 0.0316(19) 0.036(2) 0.0062(15) 0.0002(15) -0.0126(15)
O36B 0.0244(12) 0.0329(14) 0.0336(14) 0.0075(11) -0.0040(10) -0.0110(10)
C37B 0.0337(19) 0.037(2) 0.037(2) 0.0131(17) -0.0083(16) -0.0138(16)
C38B 0.0304(18) 0.0307(19) 0.042(2) 0.0118(16) -0.0097(16) -0.0094(15)
N2B 0.0226(13) 0.0244(14) 0.0323(16) 0.0040(12) -0.0051(12) -0.0058(11)
K3 0.0253(3) 0.0369(4) 0.0235(4) -0.0031(3) -0.0050(3) -0.0053(3)
N1C 0.055(2) 0.056(2) 0.038(2) -0.0060(18) -0.0203(18) -0.0007(19)
C11C 0.057(3) 0.062(3) 0.053(3) -0.007(2) -0.031(2) -0.012(3)
C12C 0.044(3) 0.073(4) 0.056(3) -0.003(3) -0.028(2) -0.008(2)
O13C 0.0287(14) 0.058(2) 0.0423(17) 0.0040(14) -0.0125(12) -0.0076(13)
C14C 0.0269(19) 0.053(3) 0.062(3) -0.001(2) -0.0020(19) -0.0153(19)
C15C 0.030(2) 0.060(3) 0.054(3) 0.002(2) 0.0021(19) -0.018(2)
O16C 0.0338(14) 0.0403(16) 0.0309(14) 0.0011(12) 0.0027(11) -0.0130(12)
C17C 0.040(2) 0.058(3) 0.033(2) -0.004(2) 0.0044(18) -0.010(2)
C18C 0.053(3) 0.042(2) 0.027(2) -0.0085(17) -0.0029(18) -0.016(2)
C21C 0.084(4) 0.060(3) 0.032(2) -0.011(2) -0.020(2) -0.004(3)
C22C 0.082(4) 0.051(3) 0.038(3) -0.015(2) -0.022(2) -0.014(3)
O23C 0.060(2) 0.0366(16) 0.0382(17) -0.0104(13) -0.0140(15) -0.0062(14)
C24C 0.062(3) 0.033(2) 0.035(2) -0.0071(17) -0.006(2) -0.011(2)
C25C 0.041(2) 0.0256(19) 0.047(2) -0.0042(17) -0.0062(18) 0.0023(16)
O26C 0.0435(16) 0.0303(14) 0.0322(15) -0.0031(11) -0.0116(12) -0.0002(12)
C27C 0.037(2) 0.0285(19) 0.041(2) 0.0021(16) -0.0163(17) -0.0032(15)
C28C 0.052(3) 0.039(2) 0.029(2) 0.0016(17) -0.0139(18) -0.0079(19)
C31C 0.092(4) 0.057(3) 0.033(2) 0.008(2) -0.024(3) -0.006(3)
C32C 0.066(3) 0.065(3) 0.041(3) 0.021(2) -0.001(2) 0.002(3)
O33C 0.0473(19) 0.078(3) 0.0406(18) 0.0249(17) -0.0115(15) -0.0200(18)
C34C 0.053(3) 0.092(5) 0.066(4) 0.039(3) -0.003(3) -0.033(3)
C35C 0.065(4) 0.079(4) 0.086(4) 0.051(4) -0.034(3) -0.047(3)
O36C 0.0492(19) 0.0442(18) 0.060(2) 0.0220(16) -0.0072(16) -0.0210(15)
C37C 0.055(3) 0.047(3) 0.066(3) 0.006(2) -0.025(3) -0.027(2)
C38C 0.040(2) 0.046(2) 0.050(3) -0.009(2) -0.0149(19) -0.0149(19)
N2C 0.0412(18) 0.0257(15) 0.0292(16) -0.0012(12) -0.0121(13) -0.0051(13)
N1D 0.086(5) 0.096(5) 0.099(5) 0.014(4) -0.026(4) -0.014(4)
C1D 0.051(3) 0.075(5) 0.043(4) 0.013(3) -0.023(3) -0.026(3)
C2D 0.072(4) 0.066(4) 0.050(4) 0.001(3) -0.009(3) -0.022(3)
N2D 0.088(5) 0.078(5) 0.062(4) 0.003(3) -0.009(4) -0.040(4)
N1E 0.136(7) 0.148(8) 0.148(7) 0.016(5) -0.030(5) -0.028(6)
C1E 0.131(8) 0.128(8) 0.126(7) 0.017(5) -0.016(6) -0.030(6)

_geom_special_details
;
 All esds (except the esd in the dihedral angle between two l.s. planes)
 are estimated using the full covariance matrix.  The cell esds are taken
 into account individually in the estimation of esds in distances, angles
 and torsion angles; correlations between esds in cell parameters are only
 used when they are defined by crystal symmetry.  An approximate (isotropic)
 treatment of cell esds is used for estimating esds involving l.s. planes.
;

loop_
 _geom_bond_atom_site_label_1
 _geom_bond_atom_site_label_2
 _geom_bond_distance
 _geom_bond_site_symmetry_2
 _geom_bond_publ_flag
Sn1 Sn4 2.9523(4) . ?
Sn1 Sn5 2.9651(4) . ?
Sn1 Sn3 3.0707(4) . ?
Sn1 Sn2 3.0860(5) . ?
Sn1 Sn7 3.2878(4) . ?
Sn2 Sn6 2.9299(4) . ?
Sn2 Sn5 2.9489(5) . ?
Sn2 Sn3 3.0647(4) . ?
Sn3 Sn6 2.9386(4) . ?
Sn3 Sn4 2.9517(4) . ?
Sn4 Sn7 2.9453(4) . ?
Sn4 Sn9 2.9679(4) . ?
Sn5 Sn7 2.9597(4) . ?
Sn5 Sn8 2.9620(4) . ?
Sn6 Sn9 2.9514(4) . ?
Sn6 Sn8 2.9869(5) . ?
Sn7 Sn9 3.0538(4) . ?
Sn7 Sn8 3.0621(4) . ?
Sn8 Sn9 3.0668(4) . ?
K1 O26A 2.747(2) . ?
K1 O36A 2.809(3) . ?
K1 O33A 2.832(3) . ?
K1 O13A 2.835(2) . ?
K1 O23A 2.841(2) . ?
K1 O16A 2.860(3) . ?
K1 N2A 2.996(3) . ?
K1 N1A 3.049(3) . ?
N1A C21A 1.469(5) . ?
N1A C11A 1.469(5) . ?
N1A C31A 1.472(5) . ?
C11A C12A 1.505(6) . ?
C12A O13A 1.421(4) . ?
O13A C14A 1.425(4) . ?
C14A C15A 1.475(6) . ?
C15A O16A 1.420(5) . ?
O16A C17A 1.436(5) . ?
C17A C18A 1.493(6) . ?
C18A N2A 1.472(6) . ?
C21A C22A 1.515(5) . ?
C22A O23A 1.425(4) . ?
O23A C24A 1.428(4) . ?
C24A C25A 1.490(5) . ?
C25A O26A 1.418(4) . ?
O26A C27A 1.423(5) . ?
C27A C28A 1.498(6) . ?
C28A N2A 1.473(5) . ?
C31A C32A 1.502(5) . ?
C32A O33A 1.433(5) . ?
O33A C34A 1.433(5) . ?
C34A C35A 1.485(7) . ?
C35A O36A 1.428(6) . ?
O36A C37A 1.434(5) . ?
C37A C38A 1.490(8) . ?
C38A N2A 1.479(6) . ?
K2 O36B 2.810(3) . ?
K2 O26B 2.812(3) . ?
K2 O13B 2.833(3) . ?
K2 O33B 2.839(3) . ?
K2 O23B 2.846(2) . ?
K2 O16B 2.855(2) . ?
K2 N2B 3.019(3) . ?
K2 N1B 3.057(3) . ?
N1B C31B 1.467(4) . ?
N1B C11B 1.474(5) . ?
N1B C21B 1.476(4) . ?
C11B C12B 1.508(6) . ?
C12B O13B 1.430(5) . ?
O13B C14B 1.426(4) . ?
C14B C15B 1.491(6) . ?
C15B O16B 1.420(4) . ?
O16B C17B 1.431(4) . ?
C17B C18B 1.498(5) . ?
C18B N2B 1.475(4) . ?
C21B C22B 1.498(5) . ?
C22B O23B 1.428(4) . ?
O23B C24B 1.418(5) . ?
C24B C25B 1.494(5) . ?
C25B O26B 1.424(4) . ?
O26B C27B 1.420(4) . ?
C27B C28B 1.511(5) . ?
C28B N2B 1.469(5) . ?
C31B C32B 1.509(5) . ?
C32B O33B 1.423(5) . ?
O33B C34B 1.431(4) . ?
C34B C35B 1.491(6) . ?
C35B O36B 1.430(4) . ?
O36B C37B 1.427(5) . ?
C37B C38B 1.512(5) . ?
C38B N2B 1.478(5) . ?
K3 O13C 2.795(3) . ?
K3 O23C 2.817(3) . ?
K3 O33C 2.822(3) . ?
K3 O26C 2.829(3) . ?
K3 O16C 2.842(3) . ?
K3 O36C 2.930(3) . ?
K3 N2C 3.016(3) . ?
K3 N1C 3.030(4) . ?
N1C C21C 1.452(6) . ?
N1C C11C 1.472(7) . ?
N1C C31C 1.482(7) . ?
C11C C12C 1.493(7) . ?
C12C O13C 1.426(6) . ?
O13C C14C 1.418(5) . ?
C14C C15C 1.447(7) . ?
C15C O16C 1.446(5) . ?
O16C C17C 1.414(5) . ?
C17C C18C 1.502(6) . ?
C18C N2C 1.477(5) . ?
C21C C22C 1.538(8) . ?
C22C O23C 1.435(6) . ?
O23C C24C 1.397(5) . ?
C24C C25C 1.502(6) . ?
C25C O26C 1.418(5) . ?
O26C C27C 1.430(5) . ?
C27C C28C 1.484(6) . ?
C28C N2C 1.485(5) . ?
C31C C32C 1.486(8) . ?
C32C O33C 1.403(7) . ?
O33C C34C 1.409(6) . ?
C34C C35C 1.485(9) . ?
C35C O36C 1.418(6) . ?
O36C C37C 1.449(6) . ?
C37C C38C 1.475(7) . ?
C38C N2C 1.463(5) . ?
N1D C1D 1.384(8) . ?
C1D C2D 1.383(10) . ?
C2D N2D 1.415(8) . ?
N1E C1E 1.381(10) . ?
C1E C1E 1.419(13) 2_665 ?
N1F C1F 1.413(10) . ?
C1F C2F 1.430(13) . ?
C2F N2F 1.394(11) . ?

loop_
 _geom_angle_atom_site_label_1
 _geom_angle_atom_site_label_2
 _geom_angle_atom_site_label_3
 _geom_angle
 _geom_angle_site_symmetry_1
 _geom_angle_site_symmetry_3
 _geom_angle_publ_flag
Sn4 Sn1 Sn5 110.286(11) . . ?
Sn4 Sn1 Sn3 58.652(10) . . ?
Sn5 Sn1 Sn3 107.156(12) . . ?
Sn4 Sn1 Sn2 107.037(11) . . ?
Sn5 Sn1 Sn2 58.290(10) . . ?
Sn3 Sn1 Sn2 59.706(8) . . ?
Sn4 Sn1 Sn7 56.018(10) . . ?
Sn5 Sn1 Sn7 56.217(8) . . ?
Sn3 Sn1 Sn7 89.607(12) . . ?
Sn2 Sn1 Sn7 89.312(9) . . ?
Sn6 Sn2 Sn5 111.089(11) . . ?
Sn6 Sn2 Sn3 58.658(9) . . ?
Sn5 Sn2 Sn3 107.729(12) . . ?
Sn6 Sn2 Sn1 107.696(10) . . ?
Sn5 Sn2 Sn1 58.802(8) . . ?
Sn3 Sn2 Sn1 59.899(10) . . ?
Sn6 Sn3 Sn4 110.567(13) . . ?
Sn6 Sn3 Sn2 58.379(10) . . ?
Sn4 Sn3 Sn2 107.608(13) . . ?
Sn6 Sn3 Sn1 107.875(12) . . ?
Sn4 Sn3 Sn1 58.669(9) . . ?
Sn2 Sn3 Sn1 60.395(10) . . ?
Sn7 Sn4 Sn3 98.975(12) . . ?
Sn7 Sn4 Sn1 67.763(9) . . ?
Sn3 Sn4 Sn1 62.679(10) . . ?
Sn7 Sn4 Sn9 62.186(9) . . ?
Sn3 Sn4 Sn9 67.772(11) . . ?
Sn1 Sn4 Sn9 99.302(12) . . ?
Sn2 Sn5 Sn7 98.676(10) . . ?
Sn2 Sn5 Sn8 67.927(9) . . ?
Sn7 Sn5 Sn8 62.275(10) . . ?
Sn2 Sn5 Sn1 62.908(11) . . ?
Sn7 Sn5 Sn1 67.410(10) . . ?
Sn8 Sn5 Sn1 99.696(11) . . ?
Sn2 Sn6 Sn3 62.963(9) . . ?
Sn2 Sn6 Sn9 99.392(11) . . ?
Sn3 Sn6 Sn9 68.161(12) . . ?
Sn2 Sn6 Sn8 67.842(9) . . ?
Sn3 Sn6 Sn8 99.578(11) . . ?
Sn9 Sn6 Sn8 62.185(9) . . ?
Sn4 Sn7 Sn5 110.628(11) . . ?
Sn4 Sn7 Sn9 59.270(10) . . ?
Sn5 Sn7 Sn9 107.751(11) . . ?
Sn4 Sn7 Sn8 108.472(11) . . ?
Sn5 Sn7 Sn8 58.898(10) . . ?
Sn9 Sn7 Sn8 60.191(8) . . ?
Sn4 Sn7 Sn1 56.219(8) . . ?
Sn5 Sn7 Sn1 56.372(9) . . ?
Sn9 Sn7 Sn1 90.633(12) . . ?
Sn8 Sn7 Sn1 90.959(9) . . ?
Sn5 Sn8 Sn6 109.144(10) . . ?
Sn5 Sn8 Sn7 58.826(8) . . ?
Sn6 Sn8 Sn7 106.450(10) . . ?
Sn5 Sn8 Sn9 107.353(10) . . ?
Sn6 Sn8 Sn9 58.339(10) . . ?
Sn7 Sn8 Sn9 59.771(9) . . ?
Sn6 Sn9 Sn4 109.762(13) . . ?
Sn6 Sn9 Sn7 107.571(11) . . ?
Sn4 Sn9 Sn7 58.544(9) . . ?
Sn6 Sn9 Sn8 59.477(11) . . ?
Sn4 Sn9 Sn8 107.759(12) . . ?
Sn7 Sn9 Sn8 60.038(10) . . ?
O26A K1 O36A 95.49(8) . . ?
O26A K1 O33A 116.49(8) . . ?
O36A K1 O33A 60.81(9) . . ?
O26A K1 O13A 136.50(8) . . ?
O36A K1 O13A 123.62(8) . . ?
O33A K1 O13A 100.28(8) . . ?
O26A K1 O23A 60.04(7) . . ?
O36A K1 O23A 132.83(8) . . ?
O33A K1 O23A 92.84(8) . . ?
O13A K1 O23A 97.68(7) . . ?
O26A K1 O16A 96.07(8) . . ?
O36A K1 O16A 102.78(9) . . ?
O33A K1 O16A 143.74(8) . . ?
O13A K1 O16A 60.05(8) . . ?
O23A K1 O16A 118.37(8) . . ?
O26A K1 N2A 60.71(8) . . ?
O36A K1 N2A 61.15(10) . . ?
O33A K1 N2A 121.10(10) . . ?
O13A K1 N2A 119.31(8) . . ?
O23A K1 N2A 120.06(8) . . ?
O16A K1 N2A 60.45(9) . . ?
O26A K1 N1A 119.82(8) . . ?
O36A K1 N1A 119.85(9) . . ?
O33A K1 N1A 60.10(8) . . ?
O13A K1 N1A 59.28(8) . . ?
O23A K1 N1A 60.26(7) . . ?
O16A K1 N1A 118.07(8) . . ?
N2A K1 N1A 178.52(9) . . ?
C21A N1A C11A 110.0(3) . . ?
C21A N1A C31A 111.0(3) . . ?
C11A N1A C31A 109.2(3) . . ?
C21A N1A K1 108.0(2) . . ?
C11A N1A K1 109.4(2) . . ?
C31A N1A K1 109.1(2) . . ?
N1A C11A C12A 114.2(3) . . ?
O13A C12A C11A 108.9(3) . . ?
C12A O13A C14A 110.4(3) . . ?
C12A O13A K1 120.2(2) . . ?
C14A O13A K1 114.8(2) . . ?
O13A C14A C15A 109.9(3) . . ?
O16A C15A C14A 109.6(3) . . ?
C15A O16A C17A 108.1(3) . . ?
C15A O16A K1 112.1(2) . . ?
C17A O16A K1 115.1(2) . . ?
O16A C17A C18A 109.1(3) . . ?
N2A C18A C17A 114.2(4) . . ?
N1A C21A C22A 113.8(3) . . ?
O23A C22A C21A 109.6(3) . . ?
C22A O23A C24A 110.7(3) . . ?
C22A O23A K1 118.27(19) . . ?
C24A O23A K1 110.77(19) . . ?
O23A C24A C25A 110.3(3) . . ?
O26A C25A C24A 109.2(3) . . ?
C25A O26A C27A 111.2(3) . . ?
C25A O26A K1 120.3(2) . . ?
C27A O26A K1 119.4(2) . . ?
O26A C27A C28A 108.6(3) . . ?
N2A C28A C27A 114.1(3) . . ?
N1A C31A C32A 113.6(3) . . ?
O33A C32A C31A 108.7(3) . . ?
C32A O33A C34A 110.8(3) . . ?
C32A O33A K1 115.3(2) . . ?
C34A O33A K1 114.2(3) . . ?
O33A C34A C35A 109.4(3) . . ?
O36A C35A C34A 109.6(3) . . ?
C35A O36A C37A 111.7(3) . . ?
C35A O36A K1 112.5(2) . . ?
C37A O36A K1 118.0(3) . . ?
O36A C37A C38A 110.1(4) . . ?
N2A C38A C37A 114.7(3) . . ?
C18A N2A C28A 109.1(4) . . ?
C18A N2A C38A 111.5(4) . . ?
C28A N2A C38A 109.8(3) . . ?
C18A N2A K1 110.0(2) . . ?
C28A N2A K1 108.4(2) . . ?
C38A N2A K1 108.0(3) . . ?
O36B K2 O26B 94.55(8) . . ?
O36B K2 O13B 125.47(8) . . ?
O26B K2 O13B 135.02(8) . . ?
O36B K2 O33B 60.83(8) . . ?
O26B K2 O33B 118.77(8) . . ?
O13B K2 O33B 100.10(8) . . ?
O36B K2 O23B 131.54(8) . . ?
O26B K2 O23B 60.22(7) . . ?
O13B K2 O23B 97.73(8) . . ?
O33B K2 O23B 93.95(7) . . ?
O36B K2 O16B 101.29(8) . . ?
O26B K2 O16B 96.37(8) . . ?
O13B K2 O16B 59.69(8) . . ?
O33B K2 O16B 140.36(8) . . ?
O23B K2 O16B 120.77(8) . . ?
O36B K2 N2B 60.64(8) . . ?
O26B K2 N2B 59.28(8) . . ?
O13B K2 N2B 119.77(8) . . ?
O33B K2 N2B 120.88(8) . . ?
O23B K2 N2B 119.04(8) . . ?
O16B K2 N2B 60.64(8) . . ?
O36B K2 N1B 119.33(8) . . ?
O26B K2 N1B 120.72(8) . . ?
O13B K2 N1B 60.26(8) . . ?
O33B K2 N1B 59.09(8) . . ?
O23B K2 N1B 60.97(7) . . ?
O16B K2 N1B 119.39(8) . . ?
N2B K2 N1B 179.97(10) . . ?
C31B N1B C11B 109.4(3) . . ?
C31B N1B C21B 110.7(3) . . ?
C11B N1B C21B 110.4(3) . . ?
C31B N1B K2 110.7(2) . . ?
C11B N1B K2 108.8(2) . . ?
C21B N1B K2 106.7(2) . . ?
N1B C11B C12B 114.4(3) . . ?
O13B C12B C11B 109.7(3) . . ?
C14B O13B C12B 110.6(3) . . ?
C14B O13B K2 114.7(2) . . ?
C12B O13B K2 117.3(2) . . ?
O13B C14B C15B 109.0(3) . . ?
O16B C15B C14B 108.9(3) . . ?
C15B O16B C17B 111.5(3) . . ?
C15B O16B K2 114.2(2) . . ?
C17B O16B K2 114.7(2) . . ?
O16B C17B C18B 109.1(3) . . ?
N2B C18B C17B 114.2(3) . . ?
N1B C21B C22B 113.8(3) . . ?
O23B C22B C21B 109.3(3) . . ?
C24B O23B C22B 111.0(3) . . ?
C24B O23B K2 111.6(2) . . ?
C22B O23B K2 114.12(19) . . ?
O23B C24B C25B 109.5(3) . . ?
O26B C25B C24B 108.9(3) . . ?
C27B O26B C25B 111.7(3) . . ?
C27B O26B K2 120.0(2) . . ?
C25B O26B K2 116.2(2) . . ?
O26B C27B C28B 108.8(3) . . ?
N2B C28B C27B 113.5(3) . . ?
N1B C31B C32B 113.4(3) . . ?
O33B C32B C31B 108.3(3) . . ?
C32B O33B C34B 110.9(3) . . ?
C32B O33B K2 116.1(2) . . ?
C34B O33B K2 113.9(2) . . ?
O33B C34B C35B 109.7(3) . . ?
O36B C35B C34B 109.0(3) . . ?
C37B O36B C35B 111.3(3) . . ?
C37B O36B K2 118.7(2) . . ?
C35B O36B K2 112.6(2) . . ?
O36B C37B C38B 109.1(3) . . ?
N2B C38B C37B 113.4(3) . . ?
C28B N2B C18B 109.3(3) . . ?
C28B N2B C38B 109.8(3) . . ?
C18B N2B C38B 109.7(3) . . ?
C28B N2B K2 111.1(2) . . ?
C18B N2B K2 108.9(2) . . ?
C38B N2B K2 108.0(2) . . ?
O13C K3 O23C 98.92(10) . . ?
O13C K3 O33C 97.96(10) . . ?
O23C K3 O33C 96.67(11) . . ?
O13C K3 O26C 122.96(10) . . ?
O23C K3 O26C 59.83(9) . . ?
O33C K3 O26C 133.94(10) . . ?
O13C K3 O16C 60.09(9) . . ?
O23C K3 O16C 136.92(10) . . ?
O33C K3 O16C 121.79(10) . . ?
O26C K3 O16C 98.33(9) . . ?
O13C K3 O36C 134.49(10) . . ?
O23C K3 O36C 120.66(10) . . ?
O33C K3 O36C 58.70(10) . . ?
O26C K3 O36C 97.56(9) . . ?
O16C K3 O36C 97.31(9) . . ?
O13C K3 N2C 120.83(10) . . ?
O23C K3 N2C 120.12(9) . . ?
O33C K3 N2C 117.41(10) . . ?
O26C K3 N2C 61.13(8) . . ?
O16C K3 N2C 61.05(9) . . ?
O36C K3 N2C 59.09(10) . . ?
O13C K3 N1C 60.17(11) . . ?
O23C K3 N1C 61.17(10) . . ?
O33C K3 N1C 60.22(12) . . ?
O26C K3 N1C 120.47(10) . . ?
O16C K3 N1C 119.65(10) . . ?
O36C K3 N1C 118.58(12) . . ?
N2C K3 N1C 177.62(11) . . ?
C21C N1C C11C 111.8(4) . . ?
C21C N1C C31C 108.6(4) . . ?
C11C N1C C31C 111.2(4) . . ?
C21C N1C K3 108.5(3) . . ?
C11C N1C K3 108.6(3) . . ?
C31C N1C K3 108.1(3) . . ?
N1C C11C C12C 115.1(4) . . ?
O13C C12C C11C 108.9(4) . . ?
C14C O13C C12C 113.4(4) . . ?
C14C O13C K3 118.2(3) . . ?
C12C O13C K3 119.1(3) . . ?
O13C C14C C15C 110.6(4) . . ?
O16C C15C C14C 111.1(4) . . ?
C17C O16C C15C 110.8(3) . . ?
C17C O16C K3 115.2(2) . . ?
C15C O16C K3 110.4(2) . . ?
O16C C17C C18C 109.5(4) . . ?
N2C C18C C17C 115.0(3) . . ?
N1C C21C C22C 112.6(4) . . ?
O23C C22C C21C 109.3(4) . . ?
C24C O23C C22C 111.0(4) . . ?
C24C O23C K3 114.9(2) . . ?
C22C O23C K3 114.8(3) . . ?
O23C C24C C25C 110.2(4) . . ?
O26C C25C C24C 108.8(3) . . ?
C25C O26C C27C 112.0(3) . . ?
C25C O26C K3 115.5(2) . . ?
C27C O26C K3 114.8(2) . . ?
O26C C27C C28C 110.0(3) . . ?
C27C C28C N2C 113.5(3) . . ?
N1C C31C C32C 115.7(4) . . ?
O33C C32C C31C 109.7(4) . . ?
C32C O33C C34C 111.8(4) . . ?
C32C O33C K3 118.7(3) . . ?
C34C O33C K3 117.3(3) . . ?
O33C C34C C35C 110.1(4) . . ?
O36C C35C C34C 108.2(5) . . ?
C35C O36C C37C 112.3(4) . . ?
C35C O36C K3 112.3(3) . . ?
C37C O36C K3 114.7(2) . . ?
O36C C37C C38C 108.9(4) . . ?
N2C C38C C37C 113.8(4) . . ?
C38C N2C C18C 109.6(3) . . ?
C38C N2C C28C 110.1(3) . . ?
C18C N2C C28C 109.3(3) . . ?
C38C N2C K3 111.8(3) . . ?
C18C N2C K3 108.0(2) . . ?
C28C N2C K3 107.9(2) . . ?
C2D C1D N1D 119.0(6) . . ?
C1D C2D N2D 115.7(6) . . ?
N1E C1E C1E 113.6(10) . 2_665 ?
N1F C1F C2F 112.0(10) . . ?
N2F C2F C1F 114.6(11) . . ?

_diffrn_measured_fraction_theta_max    0.991
_diffrn_reflns_theta_full              30.00
_diffrn_measured_fraction_theta_full   0.991
_refine_diff_density_max    4.036
_refine_diff_density_min   -1.672
_refine_diff_density_rms    0.128
 
_diffrn_orient_matrix_type            standard
_diffrn_orient_matrix_UB_11          -0.0022070
_diffrn_orient_matrix_UB_12          -0.0058516
_diffrn_orient_matrix_UB_13          -0.0449331
_diffrn_orient_matrix_UB_21           0.0529592
_diffrn_orient_matrix_UB_22           0.0370973
_diffrn_orient_matrix_UB_23          -0.0102719
_diffrn_orient_matrix_UB_31           0.0517744
_diffrn_orient_matrix_UB_32          -0.0572536
_diffrn_orient_matrix_UB_33          -0.0034540
_symmetry_space_group_name_Hall       '-P 1'
_exptl_crystal_id
'Eichhorn/Sanem 10/08/10 Sn9H #10 needles & some plates'
_diffrn_measurement_frame_width-CCD  -0.30
_diffrn_measurement_details           610,610,610,437
_diffrn_measurement_total_frames-CCD  2267
_diffrn_measurement_frame_time-CCD    5
_diffrn_measurement_total_time-CCD    6.9
_diffrn_source_voltage                50.00
_diffrn_source_current                30.00
_diffrn_detector_distance-CCD         5.000
_diffrn_measurement_frame_size-CCD    512
_diffrn_measurement_specimen_support  'MiTeGen loop'
_diffrn_detector                      'CCD area detector'
_diffrn_detector_type                 'Bruker Smart Apex II'
_diffrn_standards_decay_%             ?

#_______________________________________________________________________________
#
_publ_section_references
;
Bruker (2005). Apex2. Bruker AXS Inc., Madison, Wisconsin, USA.

Sheldrick, G. M. (1990). Acta Cryst. A46, 467-473.

Sheldrick, G. M. (1996). SADABS. University of G\"ottingen, Germany.

Sheldrick, G. M. (1997). SHELXL-97. University of G\"ottingen, Germany.

Spek, A. L. (1990). Acta Cryst., A46, C-34.
;
